# Supplementary material for: Interactome Analysis Reveals that Heterochromatin Protein 1γ (HP1γ) Is Associated with the DNA Damage Response Pathway
Source: PubMed Central journal article supplement — Cancer Res Treat. 2015 Mar 6;48(1):322–33. doi: 10.4143/crt.2014.294 (PMC4720079; doi:10.4143/crt.2014.294), 2015-03-06
Supplement: crt-2014-294-supple.pdf [file crt-2014-294-supple.pdf]

# Interactome Analysis Reveals that Heterochromatin Protein 1 $\gamma$ (HP1 $\gamma$ ) Is Associated with the DNA Damage Response Pathway

Hongtae Kim, PhD<sup>1,2</sup>, Jae Duk Choi, PhD<sup>2,3</sup>, Byung-Gyu Kim, PhD<sup>2,4</sup>, Ho Chul Kang, PhD<sup>2</sup>, Jong-Soo Lee, PhD<sup>2,3</sup>

<sup>1</sup>Department of Biological Sciences, Sungkyunkwan University, Suwon,

<sup>2</sup>Genomic Instability Research Center, Ajou University School of Medicine, Suwon,

<sup>3</sup>Department of Life Sciences, College of Natural Sciences, Ajou University, Suwon,

<sup>4</sup>Leading-edge Research Center for Drug Discovery and Development and Metabolic Disease, Kyungpook National University, Daegu, Korea

## Supplementary Data

### Table of Contents

|                             |    |
|-----------------------------|----|
| Supplementary Table 1 ..... | 2  |
| Supplementary Table 2 ..... | 6  |
| Supplementary Table 3 ..... | 14 |
| Supplementary Table 4 ..... | 25 |
| Supplementary Table 5 ..... | 28 |

**Supplementary Table 1.** List of all identified proteins in the present HP1 $\gamma$  interactome study

| No. | Description                                                                                   | Accession No.    | Molecular weight | Unique spectral count |      |       |
|-----|-----------------------------------------------------------------------------------------------|------------------|------------------|-----------------------|------|-------|
|     |                                                                                               |                  |                  | G+S                   | M    | Empty |
| 1   | Actin, cytoplasmic 1                                                                          | IPI00021439 (+1) | 42 kDa           | 5                     | 4    | 43    |
| 2   | ATP-dependent RNA helicase DDX1                                                               | IPI00293655 (+1) | 82 kDa           | 2                     | 1    | 1     |
| 3   | Bloom syndrome protein                                                                        | IPI00004859      | 159 kDa          | 2                     | 1    | 0     |
| 4   | CASP8-associated protein 2                                                                    | IPI00100798      | 223 kDa          | 0                     | 0    | 3     |
| 5   | cDNA FLJ50310, highly similar to Zinc finger protein 198                                      | IPI00941117      | 43 kDa           | 2                     | N.D. | N.D.  |
| 6   | cDNA FLJ53292, highly similar to Homo sapiens fibronectin 1 (FN1), transcript variant 5, mRNA | IPI00922213      | 111 kDa          | 2                     | N.D. | N.D.  |
| 7   | CGI-150 protein                                                                               | IPI00007102 (+4) | 55 kDa           | 0                     | 0    | 2     |
| 8   | Chromobox protein homolog 3                                                                   | IPI00297579      | 21 kDa           | 57                    | 63   | 4     |
| 9   | Cubilin                                                                                       | IPI00160130      | 399 kDa          | N.D.                  | 2    | N.D.  |
| 10  | DKFZP586J0619 protein                                                                         | IPI00740961 (+1) | 267 kDa          | N.D.                  | 2    | N.D.  |
| 11  | Elongation factor 2                                                                           | IPI00186290      | 95 kDa           | 8                     | 4    | 4     |
| 12  | Eukaryotic translation initiation factor 4B                                                   | IPI00012079 (+2) | 69 kDa           | 2                     | N.D. | 26    |
| 13  | fibrous sheath-interacting protein 2                                                          | IPI00878236      | 790 kDa          | 2                     | 1    | 2     |
| 14  | Gamma-aminobutyric acid receptor subunit gamma-1                                              | IPI00166138 (+1) | 54 kDa           | N.D.                  | 2    | N.D.  |
| 15  | Glucagon-like peptide 2 receptor                                                              | IPI00873212 (+1) | 63 kDa           | N.D.                  | 2    | N.D.  |
| 16  | Heat shock 70 kDa protein 1A/1B                                                               | IPI00304925 (+1) | 70 kDa           | 2                     | 4    | 3     |
| 17  | Heterogeneous nuclear ribonucleoprotein G                                                     | IPI00304692      | 42 kDa           | 5                     | 3    | 10    |
| 18  | Heterogeneous nuclear ribonucleoprotein L                                                     | IPI00027834      | 64 kDa           | 1                     | N.D. | 9     |
| 19  | Histone H1.2                                                                                  | IPI00217465      | 21 kDa           | N.D.                  | 2    | 3     |
| 20  | Hypothetical protein LOC643677                                                                | IPI00929313      | 802 kDa          | 2                     | 2    | 2     |
| 21  | Inorganic pyrophosphatase                                                                     | IPI00015018      | 33 kDa           | 1                     | 1    | 2     |
| 22  | Isoform 1 of 14-3-3 protein epsilon                                                           | IPI00000816      | 29 kDa           | N.D.                  | 1    | 2     |
| 23  | Isoform 1 of Bardet-Biedl syndrome 5 protein                                                  | IPI00449306 (+1) | 39 kDa           | N.D.                  | 2    | N.D.  |
| 24  | Isoform 1 of Basic immunoglobulin-like variable motif-containing protein                      | IPI00158804 (+1) | 57 kDa           | 2                     | N.D. | N.D.  |
| 25  | Isoform 1 of Bcl-2-associated transcription factor 1                                          | IPI00006079 (+1) | 106 kDa          | 13                    | 8    | 21    |
| 26  | Isoform 1 of Caprin-1                                                                         | IPI00783872 (+1) | 78 kDa           | 5                     | 3    | 1     |
| 27  | Isoform 1 of DNA-binding protein A                                                            | IPI00031801      | 40 kDa           | 6                     | 8    | 5     |
| 28  | Isoform 1 of Drebrin                                                                          | IPI00003406 (+2) | 71 kDa           | N.D.                  | N.D. | 13    |
| 29  | Isoform 1 of Dynein heavy chain 10, axonemal                                                  | IPI00784869      | 515 kDa          | N.D.                  | 2    | N.D.  |
| 30  | Isoform 1 of Elongation factor 1-delta                                                        | IPI00023048 (+5) | 31 kDa           | N.D.                  | N.D. | 4     |
| 31  | Isoform 1 of Far upstream element-binding protein 2                                           | IPI00479786 (+1) | 73 kDa           | 1                     | 1    | 4     |
| 32  | Isoform 1 of Gelsolin                                                                         | IPI00026314 (+5) | 86 kDa           | N.D.                  | N.D. | 4     |
| 33  | Isoform 1 of Heat shock cognate 71 kDa protein                                                | IPI00003865      | 71 kDa           | 1                     | 6    | 6     |
| 34  | Isoform 1 of Hermansky-Pudlak syndrome 5 protein                                              | IPI00010486 (+1) | 127 kDa          | N.D.                  | 2    | N.D.  |
| 35  | Isoform 1 of Heterogeneous nuclear ribonucleoprotein A3                                       | IPI00419373      | 40 kDa           | 2                     | 2    | 3     |

Supplementary Table 1. Continued

| No. | Description                                                                              | Accession No.    | Molecular weight | Unique spectral count |      |       |
|-----|------------------------------------------------------------------------------------------|------------------|------------------|-----------------------|------|-------|
|     |                                                                                          |                  |                  | G+S                   | M    | Empty |
| 36  | Isoform 1 of Heterogeneous nuclear ribonucleoprotein D0                                  | IPI00028888 (+1) | 38 kDa           | 2                     | 1    | 5     |
| 37  | Isoform 1 of Heterogeneous nuclear ribonucleoprotein K                                   | IPI00216049 (+3) | 51 kDa           | 4                     | 5    | 10    |
| 38  | Isoform 1 of Heterogeneous nuclear ribonucleoprotein U-like protein 1                    | IPI00013070 (+1) | 96 kDa           | 6                     | 3    | 3     |
| 39  | Isoform 1 of KH domain-containing, RNA-binding, signal transduction-associated protein 1 | IPI00008575 (+2) | 48 kDa           | N.D.                  | N.D. | 5     |
| 40  | Isoform 1 of Mitotic checkpoint protein BUB3                                             | IPI00013468 (+2) | 37 kDa           | 2                     | N.D. | 1     |
| 41  | Isoform 1 of NFX1-type zinc finger-containing protein 1                                  | IPI00165981      | 220 kDa          | 2                     | N.D. | N.D.  |
| 42  | Isoform 1 of Paraspeckle component 1                                                     | IPI00103525 (+2) | 59 kDa           | 2                     | N.D. | 1     |
| 43  | Isoform 1 of Pogo transposable element with ZNF domain                                   | IPI00410717 (+5) | 155 kDa          | 2                     | 2    | N.D.  |
| 44  | Isoform 1 of Polyadenylate-binding protein 1                                             | IPI00008524 (+3) | 71 kDa           | 2                     | 1    | 4     |
| 45  | Isoform 1 of Protein FAM98A                                                              | IPI00174442 (+2) | 55 kDa           | 2                     | 3    | N.D.  |
| 46  | Isoform 1 of Proton-coupled amino acid transporter 3                                     | IPI00418819 (+1) | 52 kDa           | N.D.                  | 2    | N.D.  |
| 47  | Isoform 1 of RNA-binding protein 10                                                      | IPI00375731 (+2) | 104 kDa          | N.D.                  | N.D. | 5     |
| 48  | Isoform 1 of Regulatory-associated protein of mTOR                                       | IPI00166044 (+1) | 149 kDa          | N.D.                  | N.D. | 2     |
| 49  | Isoform 1 of Replication protein A 32 kDa subunit                                        | IPI00013939 (+2) | 29 kDa           | 6                     | 7    | 4     |
| 50  | Isoform 1 of Serine/arginine repetitive matrix protein 2                                 | IPI00782992 (+1) | 300 kDa          | N.D.                  | N.D. | 2     |
| 51  | Isoform 1 of TBC1 domain family member 9B                                                | IPI00307257 (+1) | 141 kDa          | N.D.                  | N.D. | 2     |
| 52  | Isoform 1 of Transcription factor TFIIB component B' homolog                             | IPI00760877 (+3) | 294 kDa          | N.D.                  | 2    | N.D.  |
| 53  | Isoform 1 of Transcription intermediary factor 1-beta                                    | IPI00438229      | 89 kDa           | 17                    | 8    | N.D.  |
| 54  | Isoform 1 of Transcriptional repressor p66-alpha                                         | IPI00410330 (+3) | 68 kDa           | N.D.                  | N.D. | 2     |
| 55  | Isoform 1 of WD repeat-containing protein 33                                             | IPI00106567      | 146 kDa          | 1                     | N.D. | 2     |
| 56  | Isoform 1 of Zinc finger Ran-binding domain-containing protein 2                         | IPI00029400 (+1) | 37 kDa           | N.D.                  | 0    | 5     |
| 57  | Isoform 2 of AT-rich interactive domain-containing protein 1A                            | IPI00642705 (+2) | 218 kDa          | 2                     | N.D. | N.D.  |
| 58  | Isoform 2 of HMG box transcription factor BBX                                            | IPI00183699 (+3) | 102 kDa          | 2                     | N.D. | N.D.  |
| 59  | Isoform 2 of Heterogeneous nuclear ribonucleoprotein A1                                  | IPI00797148      | 29 kDa           | 1                     | 3    | 1     |
| 60  | Isoform 2 of Microtubule-associated serine/threonine-protein kinase 4                    | IPI00788168 (+5) | 265 kDa          | 2                     | N.D. | N.D.  |
| 61  | Isoform 2 of Mucin-19                                                                    | IPI00829833 (+1) | 564 kDa          | 2                     | 1    | N.D.  |

**Supplementary Table 1.** Continued

| No. | Description                                                        | Accession No.    | Molecular weight | Unique spectral count |      |       |
|-----|--------------------------------------------------------------------|------------------|------------------|-----------------------|------|-------|
|     |                                                                    |                  |                  | G+S                   | M    | Empty |
| 62  | Isoform 2 of Protein piccolo                                       | IPI00789624      | 531 kDa          | 2                     | N.D. | 2     |
| 63  | Isoform 2 of Retinoic acid-induced protein 1                       | IPI00449924 (+2) | 198 kDa          | N.D.                  | 2    | N.D.  |
| 64  | Isoform 2 of Tropomyosin alpha-3 chain                             | IPI00218319 (+2) | 29 kDa           | 1                     | 1    | 4     |
| 65  | Isoform 2 of Ubiquitin-associated protein 2-like                   | IPI00029019 (+4) | 104 kDa          | 3                     | 3    | 3     |
| 66  | Isoform 2 of Uncharacterized protein C7orf63                       | IPI00015625 (+2) | 101 kDa          | N.D.                  | N.D. | 2     |
| 67  | Isoform 2 of WASH complex subunit FAM21C                           | IPI00456853 (+6) | 144 kDa          | N.D.                  | 1    | 2     |
| 68  | Isoform 4 of Plasminogen activator inhibitor 1 RNA-binding protein | IPI00412714 (+1) | 42 kDa           | 7                     | 13   | 9     |
| 69  | Isoform 5 of Interleukin enhancer-binding factor 3                 | IPI00219330 (+6) | 75 kDa           | N.D.                  | N.D. | 3     |
| 70  | Isoform 5 of Serine/threonine-protein kinase MRCK alpha            | IPI00550263 (+5) | 196 kDa          | N.D.                  | 2    | N.D.  |
| 71  | Isoform B1 of Heterogeneous nuclear ribonucleoproteins A2/B1       | IPI00396378      | 37 kDa           | 1                     | 1    | 14    |
| 72  | Isoform Beta of LIM domain and actin-binding protein 1             | IPI00008918 (+1) | 85 kDa           | N.D.                  | 2    | N.D.  |
| 73  | Isoform Beta-1 of Protein phosphatase 1B                           | IPI00026612 (+4) | 53 kDa           | N.D.                  | N.D. | 8     |
| 74  | Isoform C1 of Heterogeneous nuclear ribonucleoproteins C1/C2       | IPI00216592 (+4) | 32 kDa           | 2                     | 1    | 11    |
| 75  | Isoform Long of Heterogeneous nuclear ribonucleoprotein U          | IPI00883857      | 91 kDa           | 24                    | 25   | 15    |
| 76  | Isoform Long of Splicing factor, proline- and glutamine-rich       | IPI00010740      | 76 kDa           | 28                    | 15   | 21    |
| 77  | Isoform PLZFA of Zinc finger and BTB domain-containing protein 16  | IPI00220823 (+1) | 62 kDa           | N.D.                  | 2    | N.D.  |
| 78  | Isoform Short of RNA-binding protein FUS                           | IPI00221354 (+3) | 53 kDa           | 41                    | 35   | 23    |
| 79  | Isoform Short of TATA-binding protein-associated factor 2N         | IPI00020194 (+1) | 62 kDa           | 10                    | 10   | 8     |
| 80  | Krueppel-associated box domain containing protein                  | IPI00884250      | 36 kDa           | 2                     | N.D. | N.D.  |
| 81  | LanC-like protein 2                                                | IPI00032995      | 51 kDa           | 3                     | 2    | 7     |
| 82  | latrophilin-3 precursor                                            | IPI00964226 (+5) | 165 kDa          | 2                     | N.D. | N.D.  |
| 83  | Leucine-rich repeat neuronal protein 1                             | IPI00021485      | 81 kDa           | N.D.                  | N.D. | 2     |
| 84  | Methylosome protein 50                                             | IPI00012202      | 37 kDa           | N.D.                  | N.D. | 4     |
| 85  | Methylosome subunit pICln                                          | IPI00004795 (+2) | 26 kDa           | N.D.                  | N.D. | 4     |
| 86  | Microsomal triglyceride transfer protein large subunit             | IPI00296645 (+1) | 99 kDa           | N.D.                  | 2    | N.D.  |
| 87  | Microtubule-associated protein 1B                                  | IPI00008868      | 271 kDa          | N.D.                  | N.D. | 2     |
| 88  | Msx2-interacting protein                                           | IPI00045914      | 402 kDa          | N.D.                  | 2    | 2     |
| 89  | Mucin-16                                                           | IPI00103552      | 2,353 kDa        | 1                     | 3    | 1     |
| 90  | Multidrug resistance-associated protein 5                          | IPI00385383 (+2) | 161 kDa          | 2                     | N.D. | 0     |
| 91  | Myosin-6                                                           | IPI00514201      | 224 kDa          | N.D.                  | N.D. | 2     |
| 92  | Myristoylated alanine-rich C-kinase substrate                      | IPI00219301      | 32 kDa           | 1                     | N.D. | 2     |

Supplementary Table 1. Continued

| No. | Description                                                                | Accession No.     | Molecular weight | Unique spectral count |      |       |
|-----|----------------------------------------------------------------------------|-------------------|------------------|-----------------------|------|-------|
|     |                                                                            |                   |                  | G+S                   | M    | Empty |
| 93  | Non-POU domain-containing octamer-binding protein                          | IPI00304596       | 54 kDa           | 27                    | 18   | 29    |
| 94  | Nuclease-sensitive element-binding protein 1                               | IPI00031812       | 36 kDa           | 29                    | 27   | 26    |
| 95  | Peptidyl-prolyl cis-trans isomerase-like 4                                 | IPI00642862       | 57 kDa           | N.D.                  | N.D. | 3     |
| 96  | Phosphatidylinositol 3-kinase regulatory subunit beta                      | IPI00011736       | 82 kDa           | N.D.                  | N.D. | 2     |
| 97  | Poly(rC)-binding protein 1                                                 | IPI00016610       | 37 kDa           | 1                     | 2    | 6     |
| 98  | probable ATP-dependent RNA helicase DDX17 isoform 3                        | IPI00651653 (+4)  | 80 kDa           | 2                     | 1    | 3     |
| 99  | Proliferating cell nuclear antigen                                         | IPI00021700       | 29 kDa           | N.D.                  | 1    | 3     |
| 100 | protein arginine N-methyltransferase 5 isoform b                           | IPI00064328 (+1)  | 71 kDa           | N.D.                  | N.D. | 15    |
| 101 | Protein FAM35B                                                             | IPI00749463       | 94 kDa           | 2                     | N.D. | N.D.  |
| 102 | Putative pre-mRNA-splicing factor ATP-dependent RNA helicase DHX15         | IPI00396435 (+1)  | 91 kDa           | 7                     | 8    | 5     |
| 103 | RB-associated KRAB zinc finger protein                                     | IPI00302755       | 83 kDa           | 2                     | N.D. | N.D.  |
| 104 | RING finger protein 219                                                    | IPI00465370       | 81 kDa           | N.D.                  | N.D. | 6     |
| 105 | RNA-binding protein EWS isoform 1                                          | IPI00009841 (+4)  | 69 kDa           | 29                    | 24   | 14    |
| 106 | Replication protein A 70 kDa DNA-binding subunit                           | IPI00020127       | 68 kDa           | 18                    | 13   | 17    |
| 107 | rRNA 2'-O-methyltransferase fibrillarin                                    | IPI00025039       | 34 kDa           | 3                     | 4    | 1     |
| 108 | Serine/threonine-protein phosphatase PP1-alpha catalytic subunit isoform 3 | IPI00027423 (+2)  | 39 kDa           | N.D.                  | N.D. | 2     |
| 109 | SCY1-like protein 2                                                        | IPI00396218 (+1)  | 104 kDa          | N.D.                  | N.D. | 2     |
| 110 | Scaffold attachment factor B1                                              | IPI00300631 (+5)  | 103 kDa          | 5                     | 1    | N.D.  |
| 111 | Similar to Potassium voltage-gated channel subfamily V member 2            | IPI00742690       | 9 kDa            | 2                     | N.D. | N.D.  |
| 112 | Src substrate cortactin                                                    | IPI00029601 (+1)  | 62 kDa           | 4                     | 4    | 13    |
| 113 | THO complex subunit 4                                                      | IPI00328840 (+1)  | 28 kDa           | 5                     | 8    | 4     |
| 114 | Thyroid hormone receptor-associated protein 3                              | IPI00104050       | 109 kDa          | 3                     | 1    | 19    |
| 115 | Titin, isoform CRA_a                                                       | IPI00940872       | 3,881 kDa        | 2                     | 3    | N.D.  |
| 116 | Transcriptional repressor protein YY1                                      | IPI00014513       | 45 kDa           | 3                     | 3    | 2     |
| 117 | Tropomodulin-3                                                             | IPI00005087       | 40 kDa           | N.D.                  | N.D. | 5     |
| 118 | Tubulin beta-2C chain                                                      | IPI00007752 (+18) | 50 kDa           | N.D.                  | N.D. | 2     |
| 119 | U1 small nuclear ribonucleoprotein A                                       | IPI00012382       | 31 kDa           | 1                     | 2    | 1     |
| 120 | Uncharacterized protein                                                    | IPI00645369       | 881 kDa          | N.D.                  | 2    | N.D.  |
| 121 | Uncharacterized protein                                                    | IPI00743873       | 75 kDa           | N.D.                  | N.D. | 2     |
| 122 | Uncharacterized protein                                                    | IPI00966854       | 30 kDa           | N.D.                  | N.D. | 5     |
| 123 | Uncharacterized protein                                                    | IPI00394855       | 352 kDa          | 2                     | N.D. | N.D.  |
| 124 | Uncharacterized protein                                                    | IPI00011986 (+4)  | 362 kDa          | 2                     | N.D. | N.D.  |
| 125 | WD repeat-containing protein 82                                            | IPI00152695       | 35 kDa           | 1                     | 1    | 2     |
| 126 | X-ray repair cross-complementing protein 5                                 | IPI00220834       | 83 kDa           | N.D.                  | 2    | N.D.  |
| 127 | Zinc finger protein 106 homolog                                            | IPI00782966       | 209 kDa          | N.D.                  | 2    | N.D.  |
| 128 | 33 kDa protein                                                             | IPI00413108 (+2)  | 33 kDa           | 8                     | 11   | 5     |
| 129 | 40S ribosomal protein S3a                                                  | IPI00419880 (+1)  | 30 kDa           | N.D.                  | 3    | 3     |
| 130 | 78 kDa glucose-regulated protein                                           | IPI00003362       | 72 kDa           | 1                     | 2    | N.D.  |

HP1 $\gamma$ , heterochromatin protein 1 $\gamma$ ; N.D., not detected.

**Supplementary Table 2.** The clustering of proteins that interact with HP1γ

| Category       | GO         | Term                                         | Count | %    | p-value  | Genes                                                                                                                                                                                                                                                                                                                                                                                                                                                                                                                                                                                      | List total | Pop hits | Pop total | Fold enrichment | Bonferroni | Benjamini | FDR      |
|----------------|------------|----------------------------------------------|-------|------|----------|--------------------------------------------------------------------------------------------------------------------------------------------------------------------------------------------------------------------------------------------------------------------------------------------------------------------------------------------------------------------------------------------------------------------------------------------------------------------------------------------------------------------------------------------------------------------------------------------|------------|----------|-----------|-----------------|------------|-----------|----------|
| GOTERM_ CC_FAT | GO:0043228 | Non-membrane -bounded organelle              | 44    | 35.2 | 6.78E-09 | IP100419880, IP100438229, IP100514201, IP100028888, IP100449306, IP100782966, IP100103525, IP100413108, IP100013468, IP100004795, IP100008868, IP100220823, IP100104050, IP100219330, IP100216049, IP100005087, IP100743873, IP100300631, IP100789624, IP100003406, IP100029601, IP100396378, IP100218319, IP100297579, IP100410330, IP100026314, IP100008918, IP100020127, IP100025039, IP100013939, IP100217465, IP100021700, IP100032995, IP100004859, IP100219301, IP100220834, IP100784869, IP100645369, IP100021439, IP100419373, IP100007752, IP100045914, IP100642705, IP100221354 | 92         | 2,596    | 12,782    | 2.354827        | 1.60E-06   | 5.33E-07  | 8.72E-06 |
| GOTERM_ CC_FAT | GO:0043232 | Intracellular non-membrane-bounded organelle | 44    | 35.2 | 6.78E-09 | IP100514201, IP100028888, IP100449306, IP100782966, IP100103525, IP100413108, IP100013468, IP100004795, IP100008868, IP100419880, IP100438229, IP100220823, IP100104050, IP100219330, IP100216049, IP100005087, IP100743873, IP100300631, IP100789624, IP100003406, IP100029601, IP100396378, IP100218319, IP100297579, IP100410330, IP100026314, IP100008918, IP100020127, IP100025039, IP100013939, IP100217465, IP100021700, IP100032995, IP100004859, IP100219301, IP100220834, IP100784869, IP100645369, IP100021439, IP100419373, IP100007752, IP100045914, IP100642705, IP100221354 | 92         | 2,596    | 12,782    | 2.354827        | 1.60E-06   | 5.33E-07  | 8.72E-06 |

Supplementary Table 2. Continued

| Category                  | GO         | Term                    | Count | %    | p-value  | Genes                     | List total | Pop hits | Pop total | Fold enrichment | Bonferroni | Benjamini | FDR      |
|---------------------------|------------|-------------------------|-------|------|----------|---------------------------|------------|----------|-----------|-----------------|------------|-----------|----------|
| GOTERM_ CC_FAT            | GO:0043233 | Organelle lumen         | 34    | 27.2 | 1.27E-07 | IP100217465, IP100021700, | 92         | 1,820    | 12,782    | 2.595485        | 2.99E-05   | 4.99E-06  | 1.63E-04 |
|                           |            |                         |       |      |          | IP100032995, IP100004859, |            |          |           |                 |            |           |          |
|                           |            |                         |       |      |          | IP100219301, IP100220834, |            |          |           |                 |            |           |          |
|                           |            |                         |       |      |          | IP100784869, IP100645369, |            |          |           |                 |            |           |          |
|                           |            |                         |       |      |          | IP100021439, IP100419373, |            |          |           |                 |            |           |          |
|                           |            |                         |       |      |          | IP100007752, IP100045914, |            |          |           |                 |            |           |          |
|                           |            |                         |       |      |          | IP100642705, IP100221354  |            |          |           |                 |            |           |          |
|                           |            |                         |       |      |          | IP100514201, IP100014513, |            |          |           |                 |            |           |          |
|                           |            |                         |       |      |          | IP100782966, IP100103525, |            |          |           |                 |            |           |          |
|                           |            |                         |       |      |          | IP100010740, IP100922213, |            |          |           |                 |            |           |          |
|                           |            |                         |       |      |          | IP100013468, IP100027423, |            |          |           |                 |            |           |          |
|                           |            |                         |       |      |          | IP100027834, IP100419880, |            |          |           |                 |            |           |          |
|                           |            |                         |       |      |          | IP100438229, IP100104050, |            |          |           |                 |            |           |          |
|                           |            |                         |       |      |          | IP100220823, IP100782992, |            |          |           |                 |            |           |          |
|                           |            |                         |       |      |          | IP100219330, IP100216049, |            |          |           |                 |            |           |          |
|                           |            |                         |       |      |          | IP100941117, IP100300631, |            |          |           |                 |            |           |          |
|                           |            |                         |       |      |          | IP100396378, IP100410330, |            |          |           |                 |            |           |          |
| IP100020127, IP100025039, |            |                         |       |      |          |                           |            |          |           |                 |            |           |          |
| IP100013939, IP100003362, |            |                         |       |      |          |                           |            |          |           |                 |            |           |          |
| IP100021700, IP100004859, |            |                         |       |      |          |                           |            |          |           |                 |            |           |          |
| IP100328840, IP100220834, |            |                         |       |      |          |                           |            |          |           |                 |            |           |          |
| IP100021439, IP100419373, |            |                         |       |      |          |                           |            |          |           |                 |            |           |          |
| IP100045914, IP100740961, |            |                         |       |      |          |                           |            |          |           |                 |            |           |          |
| IP100642705, IP100221354  |            |                         |       |      |          |                           |            |          |           |                 |            |           |          |
| GOTERM_ CC_FAT            | GO:0031974 | Membrane-enclosed lumen | 34    | 27.2 | 2.03E-07 | IP100514201, IP100014513, | 92         | 1,856    | 12,782    | 2.545141        | 4.79E-05   | 6.84E-06  | 2.61E-04 |
|                           |            |                         |       |      |          | IP100782966, IP100103525, |            |          |           |                 |            |           |          |
|                           |            |                         |       |      |          | IP100010740, IP100922213, |            |          |           |                 |            |           |          |
|                           |            |                         |       |      |          | IP100013468, IP100027423, |            |          |           |                 |            |           |          |
|                           |            |                         |       |      |          | IP100027834, IP100419880, |            |          |           |                 |            |           |          |
|                           |            |                         |       |      |          | IP100438229, IP100104050, |            |          |           |                 |            |           |          |
|                           |            |                         |       |      |          | IP100220823, IP100782992, |            |          |           |                 |            |           |          |
|                           |            |                         |       |      |          | IP100219330, IP100216049, |            |          |           |                 |            |           |          |
|                           |            |                         |       |      |          | IP100941117, IP100300631, |            |          |           |                 |            |           |          |
|                           |            |                         |       |      |          | IP100396378, IP100410330, |            |          |           |                 |            |           |          |
|                           |            |                         |       |      |          | IP100020127, IP100025039, |            |          |           |                 |            |           |          |
|                           |            |                         |       |      |          | IP100013939, IP100003362, |            |          |           |                 |            |           |          |
|                           |            |                         |       |      |          | IP100021700, IP100004859, |            |          |           |                 |            |           |          |

Supplementary Table 2. Continued

| Category                  | GO         | Term                          | Count | %    | p-value  | Genes                     | List total | Pop hits | Pop total | Fold enrichment | Bonferroni | Benjamini | FDR      |
|---------------------------|------------|-------------------------------|-------|------|----------|---------------------------|------------|----------|-----------|-----------------|------------|-----------|----------|
| GOTERM<br>_CC_FAT         | GO:0070013 | Intracellular organelle lumen | 33    | 26.4 | 2.61E-07 | IP100328840, IP100220834, | 92         | 1,779    | 12,782    | 2.577205        | 6.15E-05   | 7.69E-06  | 3.35E-04 |
|                           |            |                               |       |      |          | IP100021439, IP100419373, |            |          |           |                 |            |           |          |
|                           |            |                               |       |      |          | IP100045914, IP100740961, |            |          |           |                 |            |           |          |
|                           |            |                               |       |      |          | IP100642705, IP100221354  |            |          |           |                 |            |           |          |
|                           |            |                               |       |      |          | IP100514201, IP100014513, |            |          |           |                 |            |           |          |
|                           |            |                               |       |      |          | IP100782966, IP100103525, |            |          |           |                 |            |           |          |
|                           |            |                               |       |      |          | IP100010740, IP100013468, |            |          |           |                 |            |           |          |
|                           |            |                               |       |      |          | IP100027423, IP100027834, |            |          |           |                 |            |           |          |
|                           |            |                               |       |      |          | IP100419880, IP100438229, |            |          |           |                 |            |           |          |
|                           |            |                               |       |      |          | IP100104050, IP100220823, |            |          |           |                 |            |           |          |
|                           |            |                               |       |      |          | IP100782992, IP100219330, |            |          |           |                 |            |           |          |
|                           |            |                               |       |      |          | IP100216049, IP100941117, |            |          |           |                 |            |           |          |
|                           |            |                               |       |      |          | IP100300631, IP100396378, |            |          |           |                 |            |           |          |
|                           |            |                               |       |      |          | IP100410330, IP100020127, |            |          |           |                 |            |           |          |
| IP100025039, IP100013939, |            |                               |       |      |          |                           |            |          |           |                 |            |           |          |
| IP100003362, IP100021700, |            |                               |       |      |          |                           |            |          |           |                 |            |           |          |
| IP100004859, IP100328840, |            |                               |       |      |          |                           |            |          |           |                 |            |           |          |
| IP100220834, IP100021439, |            |                               |       |      |          |                           |            |          |           |                 |            |           |          |
| IP100419373, IP100045914, |            |                               |       |      |          |                           |            |          |           |                 |            |           |          |
| IP100740961, IP100642705, |            |                               |       |      |          |                           |            |          |           |                 |            |           |          |
| IP100221354               |            |                               |       |      |          |                           |            |          |           |                 |            |           |          |
| GOTERM<br>_CC_FAT         | GO:0031981 | Nuclear lumen                 | 32    | 25.6 | 7.99E-09 | IP100514201, IP100014513, | 92         | 1,450    | 12,782    | 3.066147        | 1.89E-06   | 4.71E-07  | 1.03E-05 |
|                           |            |                               |       |      |          | IP100782966, IP100103525, |            |          |           |                 |            |           |          |
|                           |            |                               |       |      |          | IP100010740, IP100013468, |            |          |           |                 |            |           |          |
|                           |            |                               |       |      |          | IP100027423, IP100027834, |            |          |           |                 |            |           |          |
|                           |            |                               |       |      |          | IP100419880, IP100438229, |            |          |           |                 |            |           |          |
|                           |            |                               |       |      |          | IP100104050, IP100220823, |            |          |           |                 |            |           |          |
|                           |            |                               |       |      |          | IP100782992, IP100219330, |            |          |           |                 |            |           |          |
|                           |            |                               |       |      |          | IP100216049, IP100941117, |            |          |           |                 |            |           |          |
|                           |            |                               |       |      |          | IP100300631, IP100396378, |            |          |           |                 |            |           |          |
|                           |            |                               |       |      |          | IP100410330, IP100020127, |            |          |           |                 |            |           |          |
|                           |            |                               |       |      |          | IP100025039, IP100013939, |            |          |           |                 |            |           |          |
|                           |            |                               |       |      |          | IP100021700, IP100004859, |            |          |           |                 |            |           |          |
|                           |            |                               |       |      |          | IP100328840, IP100220834, |            |          |           |                 |            |           |          |
|                           |            |                               |       |      |          | IP100021439, IP100419373, |            |          |           |                 |            |           |          |
| IP100045914, IP100740961, |            |                               |       |      |          |                           |            |          |           |                 |            |           |          |
| IP100642705, IP100221354  |            |                               |       |      |          |                           |            |          |           |                 |            |           |          |

Supplementary Table 2. Continued

| Category          | GO         | Term                      | Count | %    | p-value  | Genes                                                                                                                                                                                                                                                                                                                                | List total | Pop hits | Pop total | Fold enrichment | Bonferroni | Benjamini | FDR      |
|-------------------|------------|---------------------------|-------|------|----------|--------------------------------------------------------------------------------------------------------------------------------------------------------------------------------------------------------------------------------------------------------------------------------------------------------------------------------------|------------|----------|-----------|-----------------|------------|-----------|----------|
| GOTERM<br>_CC_FAT | GO:0030529 | Ribonucleoprotein complex | 25    | 20   | 9.52E-14 | IP100003865, IP100028888, IP100413108, IP100304692, IP100012382, IP100883857, IP100419880, IP100027834, IP100782992, IP100219330, IP100216049, IP100016610, IP100008524, IP100396378, IP100186290, IP100293655, IP100025039, IP100216592, IP100328840, IP100021439, IP100419373, IP1000031812, IP100396435, IP100013070, IP100304925 | 92         | 515      | 12,782    | 6.744407        | 2.25E-11   | 2.25E-11  | 1.22E-10 |
| GOTERM<br>_CC_FAT | GO:005829  | Cytosol                   | 23    | 18.4 | 1.22E-04 | IP100783872, IP100015018, IP100012079, IP100166044, IP100028888, IP100003865, IP100026314, IP100782966, IP100413108, IP100027423, IP100003362, IP100013468, IP100032995, IP100004795, IP100000816, IP100008868, IP100419880, IP100021439, IP100220823, IP100023048, IP100007752, IP100011736, IP100008524                            | 92         | 1,330    | 12,782    | 2.402632        | 0.028359   | 0.002612  | 0.156803 |
| GOTERM<br>_CC_FAT | GO:0005654 | Nucleoplasm               | 20    | 16   | 1.13E-05 | IP100396378, IP100410330, IP100020127, IP100014513, IP100013939, IP100103525, IP100027423, IP100021700, IP100328840, IP100004859, IP100220834, IP100027834, IP100021439, IP100438229, IP100104050, IP100220823, IP100782992, IP100216049, IP100941117, IP100740961                                                                   | 92         | 882      | 12,782    | 3.150449        | 0.002657   | 2.66E-04  | 0.014512 |
| GOTERM<br>_CC_FAT | GO:0005856 | Cytoskeleton              | 20    | 16   | 0.003494 | IP100514201, IP100029601, IP100218319, IP100297579,                                                                                                                                                                                                                                                                                  | 92         | 1,381    | 12,782    | 2.01209         | 0.562173   | 0.042539  | 4.405239 |

Supplementary Table 2. Continued

| Category                  | GO        | Term              | Count | %    | p-value  | Genes                     | List total | Pop hits | Pop total | Fold enrichment | Bonferroni | Benjamini | FDR      |
|---------------------------|-----------|-------------------|-------|------|----------|---------------------------|------------|----------|-----------|-----------------|------------|-----------|----------|
| GOTERM<br>_CC_FAT         | GO:005730 | Nucleolus         | 18    | 14.4 | 7.22E-06 | IP100008918, IP100026314, | 92         | 698      | 12,782    | 3.582845        | 0.001703   | 1.89E-04  | 0.009297 |
|                           |           |                   |       |      |          | IP100020127, IP100449306, |            |          |           |                 |            |           |          |
|                           |           |                   |       |      |          | IP100032995, IP100004795, |            |          |           |                 |            |           |          |
|                           |           |                   |       |      |          | IP100219301, IP100008868, |            |          |           |                 |            |           |          |
|                           |           |                   |       |      |          | IP100645369, IP100784869, |            |          |           |                 |            |           |          |
|                           |           |                   |       |      |          | IP100021439, IP100743873, |            |          |           |                 |            |           |          |
|                           |           |                   |       |      |          | IP100005087, IP100007752, |            |          |           |                 |            |           |          |
|                           |           |                   |       |      |          | IP100789624, IP100003406  |            |          |           |                 |            |           |          |
|                           |           |                   |       |      |          | IP100514201, IP100396378, |            |          |           |                 |            |           |          |
|                           |           |                   |       |      |          | IP100410330, IP100025039, |            |          |           |                 |            |           |          |
|                           |           |                   |       |      |          | IP100782966, IP100103525, |            |          |           |                 |            |           |          |
|                           |           |                   |       |      |          | IP100013468, IP100004859, |            |          |           |                 |            |           |          |
|                           |           |                   |       |      |          | IP100419880, IP100104050, |            |          |           |                 |            |           |          |
| IP100220823, IP100419373, |           |                   |       |      |          |                           |            |          |           |                 |            |           |          |
| IP100216049, IP100219330, |           |                   |       |      |          |                           |            |          |           |                 |            |           |          |
| IP100045914, IP100642705, |           |                   |       |      |          |                           |            |          |           |                 |            |           |          |
| IP100221354, IP100300631  |           |                   |       |      |          |                           |            |          |           |                 |            |           |          |
| GOTERM<br>_CC_FAT         | GO:004451 | Nucleoplasm part  | 13    | 10.4 | 5.48E-04 | IP100410330, IP100014513, | 92         | 555      | 12,782    | 3.254328        | 0.121448   | 0.009911  | 0.703788 |
|                           |           |                   |       |      |          | IP100020127, IP100103525, |            |          |           |                 |            |           |          |
|                           |           |                   |       |      |          | IP100027423, IP100328840, |            |          |           |                 |            |           |          |
|                           |           |                   |       |      |          | IP100004859, IP100021439, |            |          |           |                 |            |           |          |
|                           |           |                   |       |      |          | IP100220823, IP100104050, |            |          |           |                 |            |           |          |
|                           |           |                   |       |      |          | IP100782992, IP100941117, |            |          |           |                 |            |           |          |
|                           |           |                   |       |      |          | IP100740961               |            |          |           |                 |            |           |          |
|                           |           |                   |       |      |          | IP100514201, IP100032995, |            |          |           |                 |            |           |          |
|                           |           |                   |       |      |          | IP100219301, IP100008868, |            |          |           |                 |            |           |          |
|                           |           |                   |       |      |          | IP100218319, IP100297579, |            |          |           |                 |            |           |          |
|                           |           |                   |       |      |          | IP100008918, IP100784869, |            |          |           |                 |            |           |          |
|                           |           |                   |       |      |          | IP100007752, IP100449306, |            |          |           |                 |            |           |          |
|                           |           |                   |       |      |          | IP100743873, IP100003406  |            |          |           |                 |            |           |          |
| GOTERM<br>_CC_FAT         | GO:004430 | Cytoskeletal part | 12    | 9.6  | 0.074781 | IP100514201, IP100032995, | 92         | 952      | 12,782    | 1.751279        | 1          | 0.416962  | 63.23272 |
|                           |           |                   |       |      |          | IP100219301, IP100008868, |            |          |           |                 |            |           |          |
|                           |           |                   |       |      |          | IP100218319, IP100297579, |            |          |           |                 |            |           |          |
|                           |           |                   |       |      |          | IP100008918, IP100784869, |            |          |           |                 |            |           |          |
|                           |           |                   |       |      |          | IP100007752, IP100449306, |            |          |           |                 |            |           |          |
|                           |           |                   |       |      |          | IP100743873, IP100003406  |            |          |           |                 |            |           |          |
|                           |           |                   |       |      |          | IP100012382, IP100396378, |            |          |           |                 |            |           |          |
|                           |           |                   |       |      |          | IP100328840, IP100883857, |            |          |           |                 |            |           |          |
|                           |           |                   |       |      |          | IP100782992, IP100419373, |            |          |           |                 |            |           |          |
|                           |           |                   |       |      |          | IP100216049, IP100396435, |            |          |           |                 |            |           |          |
|                           |           |                   |       |      |          | IP100216592, IP100008524, |            |          |           |                 |            |           |          |
|                           |           |                   |       |      |          | IP100304692               |            |          |           |                 |            |           |          |
|                           |           |                   |       |      |          | GOTERM<br>_CC_FAT         |            |          |           |                 |            |           |          |
| IP100328840, IP100883857, |           |                   |       |      |          |                           |            |          |           |                 |            |           |          |
| IP100782992, IP100419373, |           |                   |       |      |          |                           |            |          |           |                 |            |           |          |
| IP100216049, IP100396435, |           |                   |       |      |          |                           |            |          |           |                 |            |           |          |
| IP100216592, IP100008524, |           |                   |       |      |          |                           |            |          |           |                 |            |           |          |
| IP100304692               |           |                   |       |      |          |                           |            |          |           |                 |            |           |          |

Supplementary Table 2. Continued

| Category          | GO         | Term                                            | Count | %   | p-value  | Genes                                                                                                                            | List total | Pop hits | Pop total | Fold enrichment | Bonferroni | Benjamini | FDR      |
|-------------------|------------|-------------------------------------------------|-------|-----|----------|----------------------------------------------------------------------------------------------------------------------------------|------------|----------|-----------|-----------------|------------|-----------|----------|
| GOTERM<br>_CC_FAT | GO:0005694 | Chromosome                                      | 10    | 8   | 0.005387 | IP100217465, IP100013468, IP100021700, IP100004859, IP100297579, IP100028888, IP100220834, IP100438229, IP100020127, IP100013939 | 92         | 460      | 12,782    | 3.020321        | 0.72053    | 0.058902  | 6.71771  |
| GOTERM<br>_CC_FAT | GO:0042995 | Cell projection                                 | 10    | 8   | 0.059574 | IP100783872, IP100027423, IP100029601, IP100008868, IP100026314, IP100784869, IP100021439, IP100449306, IP100160130, IP100003406 | 92         | 697      | 12,782    | 1.993325        | 0.999999   | 0.355489  | 54.64719 |
| GOTERM<br>_CC_FAT | GO:0044427 | Chromosomal part                                | 9     | 7.2 | 0.006169 | IP100217465, IP100013468, IP100021700, IP100004859, IP100297579, IP100220834, IP100438229, IP100020127, IP100013939              | 92         | 386      | 12,782    | 3.239412        | 0.767852   | 0.061521  | 7.656929 |
| GOTERM<br>_CC_FAT | GO:0016604 | Nuclear body                                    | 8     | 6.4 | 1.92E-04 | IP100004859, IP100328840, IP100410330, IP100020127, IP100220823, IP100782992, IP100103525, IP100941117                           | 92         | 168      | 12,782    | 6.615942        | 0.044208   | 0.003761  | 0.246333 |
| GOTERM<br>_CC_FAT | GO:0015629 | Actin cytoskeleton                              | 8     | 6.4 | 0.003042 | IP100514201, IP100032995, IP100219301, IP100218319, IP100026314, IP100008918, IP100645369, IP100003406                           | 92         | 269      | 12,782    | 4.131889        | 0.51271    | 0.039152  | 3.845476 |
| GOTERM<br>_CC_FAT | GO:0015630 | Microtubule cytoskeleton                        | 8     | 6.4 | 0.096029 | IP100219301, IP100008868, IP100297579, IP100645369, IP100784869, IP100007752, IP100449306, IP100743873                           | 92         | 549      | 12,782    | 2.024551        | 1          | 0.457151  | 72.73703 |
| GOTERM<br>_CC_FAT | GO:0016023 | Cytoplasmic membrane-bounded vesicle            | 8     | 6.4 | 0.096726 | IP100003362, IP100000816, IP100003865, IP100645369, IP100789624, IP100160130, IP100396218, IP100922213                           | 92         | 550      | 12,782    | 2.02087         | 1          | 0.451301  | 73.00656 |
| GOTERM<br>_CC_FAT | GO:0030530 | Heterogeneous nuclear ribonucleoprotein complex | 7     | 5.6 | 1.28E-09 | IP100396378, IP100883857, IP100028888, IP100027834, IP100216049, IP100013070, IP100304692                                        | 92         | 17       | 12,782    | 57.20844        | 3.02E-07   | 1.51E-07  | 1.65E-06 |
| GOTERM<br>_CC_FAT | GO:0048471 | Perinuclear region of cytoplasm                 | 7     | 5.6 | 0.016773 | IP100514201, IP100412714, IP100003362, IP100008868,                                                                              | 92         | 288      | 12,782    | 3.376887        | 0.981538   | 0.142333  | 19.56765 |

Supplementary Table 2. Continued

| Category | GO         | Term                         | Count | %   | p-value  | Genes                                                                        | List total | Pop hits | Pop total | Fold enrichment | Bonferroni | Benjamini | FDR      |
|----------|------------|------------------------------|-------|-----|----------|------------------------------------------------------------------------------|------------|----------|-----------|-----------------|------------|-----------|----------|
|          |            |                              |       |     |          | IP100026314, IP100385383, IP100396218                                        |            |          |           |                 |            |           |          |
| GOTERM   | GO:0044454 | Nuclear chromosome part      | 6     | 4.8 | 0.001764 | IP100004859, IP100297579, IP100220834, IP100438229, IP100020127, IP100013939 | 92         | 122      | 12,782    | 6.832858        | 0.340764   | 0.024212  | 2.247202 |
| GOTERM   | GO:0000228 | Nuclear chromosome           | 6     | 4.8 | 0.005957 | IP100004859, IP100297579, IP100220834, IP100438229, IP100020127, IP100013939 | 92         | 162      | 12,782    | 5.145733        | 0.755871   | 0.062083  | 7.403115 |
| GOTERM   | GO:0034399 | Nuclear periphery            | 5     | 4   | 9.20E-04 | IP100021700, IP100004859, IP100014513, IP100103525, IP100010740              | 92         | 61       | 12,782    | 11.3881         | 0.195314   | 0.015402  | 1.178326 |
| GOTERM   | GO:0005657 | Replication fork             | 4     | 3.2 | 0.001491 | IP100021700, IP100004859, IP100020127, IP100013939                           | 92         | 32       | 12,782    | 17.36685        | 0.296835   | 0.023204  | 1.90262  |
| GOTERM   | GO:0016605 | PML body                     | 4     | 3.2 | 0.001632 | IP100004859, IP100020127, IP100220823, IP1000941117                          | 92         | 33       | 12,782    | 16.84058        | 0.319838   | 0.023801  | 2.080429 |
| GOTERM   | GO:0016363 | Nuclear matrix               | 4     | 3.2 | 0.00737  | IP100004859, IP100014513, IP100103525, IP100010740                           | 92         | 56       | 12,782    | 9.923913        | 0.825506   | 0.070161  | 9.083778 |
| GOTERM   | GO:0032993 | Protein-DNA complex          | 4     | 3.2 | 0.02337  | IP100217465, IP100220834, IP100020127, IP100013939                           | 92         | 86       | 12,782    | 6.462083        | 0.99623    | 0.180705  | 26.24427 |
| GOTERM   | GO:0016607 | Nuclear speck                | 4     | 3.2 | 0.037073 | IP100328840, IP100410330, IP100220823, IP100782992                           | 92         | 103      | 12,782    | 5.395526        | 0.999866   | 0.257091  | 38.51098 |
| GOTERM   | GO:0005938 | Cell cortex                  | 4     | 3.2 | 0.085974 | IP100029601, IP100032995, IP100219301, IP100021439                           | 92         | 146      | 12,782    | 3.806432        | 1          | 0.454556  | 68.56477 |
| GOTERM   | GO:0044445 | Cytosolic part               | 4     | 3.2 | 0.094261 | IP100003362, IP100419880, IP100011736, IP100413108                           | 92         | 152      | 12,782    | 3.656178        | 1          | 0.468198  | 72.04264 |
| GOTERM   | GO:0045120 | Pronucleus                   | 3     | 2.4 | 0.003716 | IP100004859, IP100027834, IP100216592                                        | 92         | 13       | 12,782    | 32.06187        | 0.584612   | 0.042976  | 4.679182 |
| GOTERM   | GO:0043073 | Germ cell nucleus            | 3     | 2.4 | 0.008763 | IP100004859, IP100219301, IP100020127                                        | 92         | 20       | 12,782    | 20.84022        | 0.874722   | 0.07973   | 10.71227 |
| GOTERM   | GO:0016585 | Chromatin remodeling complex | 3     | 2.4 | 0.0909   | IP100410330, IP100375731, IP100642705                                        | 92         | 71       | 12,782    | 5.870484        | 1          | 0.464602  | 70.67736 |
| GOTERM   | GO:0005719 | Nuclear Euchromatin          | 2     | 1.6 | 0.021208 | IP100297579, IP100438229                                                     | 92         | 3        | 12,782    | 92.62319        | 0.993648   | 0.170862  | 24.115   |
| GOTERM   | GO:0000791 | Euchromatin                  | 2     | 1.6 | 0.028178 | IP100297579, IP100438229                                                     | 92         | 4        | 12,782    | 69.46739        | 0.998824   | 0.207533  | 30.78477 |

Supplementary Table 2. Continued

| Category          | GO         | Term                             | Count | %   | p-value  | Genes                    | List total | Pop hits | Pop total | Fold enrichment | Bonferroni | Benjamini | FDR      |
|-------------------|------------|----------------------------------|-------|-----|----------|--------------------------|------------|----------|-----------|-----------------|------------|-----------|----------|
| GOTERM<br>_CC_FAT | GO:0005662 | DNA replication factor A complex | 2     | 1.6 | 0.041971 | IP100020127, IP100013939 | 92         | 6        | 12,782    | 46.31159        | 0.99996    | 0.2785    | 42.41841 |
| GOTERM<br>_CC_FAT | GO:0070688 | MLL5-L complex                   | 2     | 1.6 | 0.055571 | IP100027423, IP100021439 | 92         | 8        | 12,782    | 34.7337         | 0.999999   | 0.344044  | 52.09806 |
| GOTERM<br>_CC_FAT | GO:0043601 | Nuclear replisome                | 2     | 1.6 | 0.095234 | IP100020127, IP100013939 | 92         | 14       | 12,782    | 19.84783        | 1          | 0.462885  | 72.42687 |
| GOTERM<br>_CC_FAT | GO:0030894 | Replisome                        | 2     | 1.6 | 0.095234 | IP100020127, IP100013939 | 92         | 14       | 12,782    | 19.84783        | 1          | 0.462885  | 72.42687 |

HP1 $\gamma$ , heterochromatin protein 1 $\gamma$ ; FDR, false discovery rate.

Supplementary Table 3. Functional annotation of proteins that interact with HP1 $\gamma$ 

| Category        | Term                  | Count | %   | p-value  | Genes                                                                        | List total | Pop his | Pop total | Fold enrichment | Bonferroni | Benjamini | FDR      |
|-----------------|-----------------------|-------|-----|----------|------------------------------------------------------------------------------|------------|---------|-----------|-----------------|------------|-----------|----------|
| SP_PIR_KEYWORDS | Pre-mRNA splicing     | 2     | 1.6 | 0.043219 | IP100012382, IP100010740                                                     | 122        | 7       | 19,235    | 45.04684        | 0.999914   | 0.218453  | 42.82394 |
| SP_PIR_KEYWORDS | Molecular chaperone   | 2     | 1.6 | 0.078785 | IP100003865, IP100304925                                                     | 122        | 13      | 19,235    | 24.25599        | 1          | 0.339143  | 64.59688 |
| SP_PIR_KEYWORDS | Methylated amino acid | 3     | 2.4 | 0.006924 | IP100514201, IP100021439, IP100025039                                        | 122        | 20      | 19,235    | 23.64959        | 0.770779   | 0.05722   | 8.416762 |
| SP_PIR_KEYWORDS | DNA recombination     | 3     | 2.4 | 0.022645 | IP100220834, IP100010740, IP100304596                                        | 122        | 37      | 19,235    | 12.78356        | 0.992218   | 0.136834  | 25.16092 |
| SP_PIR_KEYWORDS | Tandem repeat         | 3     | 2.4 | 0.080974 | IP100514201, IP100743873, IP100221354                                        | 122        | 75      | 19,235    | 6.306557        | 1          | 0.340526  | 65.64666 |
| SP_PIR_KEYWORDS | Actin binding         | 4     | 3.2 | 0.002024 | IP100514201, IP100219301, IP100218319, IP100026314                           | 122        | 40      | 19,235    | 15.76639        | 0.349244   | 0.021252  | 2.531646 |
| SP_PIR_KEYWORDS | DNA replication       | 4     | 3.2 | 0.018087 | IP100021700, IP100004859, IP100020127, IP100019399                           | 122        | 88      | 19,235    | 7.166542        | 0.979134   | 0.11735   | 20.62318 |
| SP_PIR_KEYWORDS | Viral nucleoprotein   | 5     | 4   | 3.13E-05 | IP100883857, IP100027834, IP100216049, IP100013070, IP100304692              | 122        | 29      | 19,235    | 27.18344        | 0.00662    | 5.11E-04  | 0.039637 |
| SP_PIR_KEYWORDS | Nucleotide binding    | 5     | 4   | 0.004672 | IP100514201, IP100186290, IP100883857, IP100651653, IP100385383              | 122        | 107     | 19,235    | 7.367474        | 0.629456   | 0.046175  | 5.753405 |
| SP_PIR_KEYWORDS | P-loop                | 5     | 4   | 0.006209 | IP100514201, IP100186290, IP100883857, IP100651653, IP100385383              | 122        | 116     | 19,235    | 6.795859        | 0.732969   | 0.058252  | 7.578378 |
| SP_PIR_KEYWORDS | Helicase              | 5     | 4   | 0.010218 | IP100004859, IP100293655, IP100220834, IP100651653, IP100396435              | 122        | 134     | 19,235    | 5.882983        | 0.88665    | 0.080331  | 12.18636 |
| SP_PIR_KEYWORDS | Protein biosynthesis  | 5     | 4   | 0.03105  | IP100186290, IP100012079, IP100419880, IP100023048, IP100413108              | 122        | 188     | 19,235    | 4.19319         | 0.998753   | 0.173915  | 32.90918 |
| SP_PIR_KEYWORDS | Proto-oncogene        | 5     | 4   | 0.057456 | IP100218319, IP100020194, IP100220823, IP100009841, IP100221354              | 122        | 230     | 19,235    | 3.427477        | 0.999996   | 0.269202  | 52.70412 |
| SP_PIR_KEYWORDS | ATP                   | 6     | 4.8 | 0.016799 | IP100514201, IP100883857, IP100003865, IP100651653, IP100385383, IP100304925 | 122        | 236     | 19,235    | 4.008405        | 0.972445   | 0.116485  | 19.2948  |

Supplementary Table 3. Continued

| Category        | Term                      | Count | %   | p-value  | Genes                                                                                                                            | List total | Pop hits | Pop total | Fold enrichment | Bonferroni | Benjamini | FDR      |
|-----------------|---------------------------|-------|-----|----------|----------------------------------------------------------------------------------------------------------------------------------|------------|----------|-----------|-----------------|------------|-----------|----------|
| SP_PIR_KEYWORDS | wd repeat                 | 6     | 4.8 | 0.030418 | IP100013468, IP100152695, IP100166044, IP100782966, IP100106567, IP100012202                                                     | 122        | 276      | 19,235    | 3.427477        | 0.998568   | 0.175197  | 32.35328 |
| SP_PIR_KEYWORDS | DNA binding               | 6     | 4.8 | 0.063737 | IP100028888, IP100031801, IP100220834, IP100031812, IP100216049, IP100010740                                                     | 122        | 340      | 19,235    | 2.782305        | 0.999999   | 0.288612  | 56.54055 |
| SP_PIR_KEYWORDS | RNA binding               | 8     | 6.4 | 3.47E-10 | IP100012382, IP100396378, IP100012079, IP100020194, IP100008575, IP100651653, IP100216049, IP100221354                           | 122        | 28       | 19,235    | 45.04684        | 7.36E-08   | 9.20E-09  | 4.39E-07 |
| SP_PIR_KEYWORDS | Actin-binding             | 8     | 6.4 | 9.65E-04 | IP100514201, IP100219301, IP100218319, IP100026314, IP100008918, IP100645369, IP100005087, IP100003406                           | 122        | 247      | 19,235    | 5.106524        | 0.185084   | 0.011306  | 1.214166 |
| SP_PIR_KEYWORDS | Chromosomal rearrangement | 8     | 6.4 | 0.00194  | IP100218319, IP100020194, IP100220823, IP100009841, IP100941117, IP100221354, IP100010740, IP100304596                           | 122        | 279      | 19,235    | 4.52083         | 0.337459   | 0.021434  | 2.427178 |
| SP_PIR_KEYWORDS | Activator                 | 9     | 7.2 | 0.01704  | IP100302755, IP100014513, IP100104050, IP100760877, IP100100798, IP100013070, IP100103525, IP100010740, IP100304596              | 122        | 520      | 19,235    | 2.728799        | 0.973844   | 0.11437   | 19.54546 |
| SP_PIR_KEYWORDS | Spliceosome               | 10    | 8   | 6.65E-08 | IP100012382, IP100396378, IP100328840, IP100883857, IP100782992, IP100419373, IP100216049, IP100216592, IP100008524, IP100304692 | 122        | 120      | 19,235    | 13.13866        | 1.41E-05   | 1.28E-06  | 8.41E-05 |
| SP_PIR_KEYWORDS | Isopeptide bond           | 10    | 8   | 1.88E-04 | IP100514201, IP100217465, IP100013468, IP100021700, IP100645369, IP100031812, IP100216049, IP100100798, IP100216592, IP100922213 | 122        | 319      | 19,235    | 4.942443        | 0.039166   | 0.002494  | 0.238181 |
| SP_PIR_KEYWORDS | ubl conjugation           | 10    | 8   | 0.01201  | IP100514201, IP100217465, IP100013468, IP100021700, IP100220834, IP100645369, IP100031812, IP100216049, IP100100798, IP100216592 | 122        | 588      | 19,235    | 2.681359        | 0.922821   | 0.087426  | 14.17792 |

Supplementary Table 3. Continued

| Category        | Term              | Count | %    | p-value  | Genes                                                                                                                                                                                                                        | List total | Pop hits | Pop total | Fold enrichment | Bonferroni | Benjamini | FDR      |
|-----------------|-------------------|-------|------|----------|------------------------------------------------------------------------------------------------------------------------------------------------------------------------------------------------------------------------------|------------|----------|-----------|-----------------|------------|-----------|----------|
| SP_PIR_KEYWORDS | Cytoskeleton      | 11    | 8.8  | 0.006886 | IP100029601, IP1000219301, IP100004795, IP1000218319, IP100026314, IP1000008918, IP1000645369, IP1000784869, IP100021439, IP1000005087, IP100449306                                                                          | 122        | 636      | 19,235    | 2.726892        | 0.768904   | 0.059213  | 8.372229 |
| SP_PIR_KEYWORDS | Ribonucleoprotein | 14    | 11.2 | 2.31E-08 | IP100396378, IP100028888, IP100025039, IP1000216592, IP100413108, IP1000304692, IP100012382, IP100883857, IP100027834, IP100419880, IP100419373, IP1000216049, IP100016610, IP100013070                                      | 122        | 279      | 19,235    | 7.911452        | 4.90E-06   | 4.90E-07  | 2.93E-05 |
| SP_PIR_KEYWORDS | Repressor         | 14    | 11.2 | 3.63E-06 | IP100302755, IP100297579, IP100410330, IP100031801, IP100014513, IP100006079, IP100100798, IP100010740, IP100438229, IP100031812, IP100009841, IP100045914, IP100013070, IP1000300631                                        | 122        | 435      | 19,235    | 5.074242        | 7.69E-04   | 6.41E-05  | 0.00459  |
| SP_PIR_KEYWORDS | ATP-binding       | 16    | 12.8 | 0.019301 | IP100514201, IP100293655, IP100003865, IP100651653, IP100385383, IP100788168, IP100550263, IP100003362, IP100004859, IP100883857, IP100784869, IP100220834, IP100021439, IP100104050, IP100396435, IP100304925               | 122        | 1,326    | 19,235    | 1.902431        | 0.983947   | 0.121132  | 21.85584 |
| SP_PIR_KEYWORDS | mRNA splicing     | 17    | 13.6 | 2.78E-13 | IP100396378, IP100375731, IP100479786, IP100216592, IP100010740, IP100304692, IP100012382, IP100328840, IP100883857, IP100029400, IP100782992, IP100419373, IP100031812, IP1000216049, IP100396435, IP100008524, IP100304596 | 122        | 209      | 19,235    | 12.82434        | 5.89E-11   | 9.82E-12  | 3.52E-10 |

Supplementary Table 3. Continued

| Category        | Term               | Count | %    | p-value  | Genes                                                                                                                                                                                                                                                              | List total | Pop hits | Pop total | Fold enrichment | Bonferroni | Benjamini | FDR      |
|-----------------|--------------------|-------|------|----------|--------------------------------------------------------------------------------------------------------------------------------------------------------------------------------------------------------------------------------------------------------------------|------------|----------|-----------|-----------------|------------|-----------|----------|
| SP_PIR_KEYWORDS | mRNA processing    | 17    | 13.6 | 7.90E-12 | IP100396378, IP100375731, IP100479786, IP100216592, IP100010740, IP100304692, IP100012382, IP100328840, IP100883857, IP100029400, IP100782992, IP100419373, IP100031812, IP100216049, IP100396435, IP100008524, IP100304596                                        | 122        | 260      | 19,235    | 10.3088         | 1.67E-09   | 2.39E-10  | 9.99E-09 |
| SP_PIR_KEYWORDS | Nucleotide-binding | 18    | 14.4 | 0.035014 | IP100514201, IP100186290, IP100293655, IP100003865, IP100651653, IP100385383, IP100788168, IP100550263, IP100003362, IP100004859, IP100883857, IP100784869, IP100220834, IP100021439, IP100104050, IP100396435, IP100007752, IP100304925                           | 122        | 1,686    | 19,235    | 1.683245        | 0.999477   | 0.184714  | 36.30018 |
| SP_PIR_KEYWORDS | Methylation        | 20    | 16   | 8.04E-16 | IP100514201, IP100396378, IP100020194, IP100028888, IP100025039, IP100008575, IP100010740, IP100304692, IP100217465, IP100328840, IP100883857, IP100021439, IP100104050, IP100419373, IP100009841, IP100216049, IP100219330, IP100013070, IP100221354, IP100008524 | 122        | 242      | 19,235    | 13.03008        | 1.65E-13   | 3.30E-14  | 9.88E-13 |
| SP_PIR_KEYWORDS | Zinc-finger        | 20    | 16   | 0.010866 | IP100302755, IP100449924, IP100020194, IP100410330, IP100020127, IP100014513, IP100884250, IP100375731, IP100782966, IP100410717, IP100550263, IP100029400, IP100438229, IP100220823, IP100465370, IP100009841, IP100941117, IP100165981, IP100221354, IP100789624 | 122        | 1,718    | 19,235    | 1.835436        | 0.90135    | 0.082208  | 12.91138 |

Supplementary Table 3. Continued

| Category                  | Term                     | Count | %    | p-value  | Genes                     | List total                | Pop hits | Pop total | Fold enrichment | Bonferroni | Benjamini | FDR      |      |    |      |          |                           |     |       |        |          |          |          |         |
|---------------------------|--------------------------|-------|------|----------|---------------------------|---------------------------|----------|-----------|-----------------|------------|-----------|----------|------|----|------|----------|---------------------------|-----|-------|--------|----------|----------|----------|---------|
| SP_PIR_KEYWORDS           | Coiled coil              | 20    | 16   | 0.048022 | IP100514201, IP100783872, | 122                       | 2,019    | 19,235    | 1.561802        | 0.999971   | 0.234722  | 46.35145 |      |    |      |          |                           |     |       |        |          |          |          |         |
|                           |                          |       |      |          | IP100183699, IP100218319, |                           |          |           |                 |            |           |          |      |    |      |          |                           |     |       |        |          |          |          |         |
|                           |                          |       |      |          | IP100410330, IP100394855, |                           |          |           |                 |            |           |          |      |    |      |          |                           |     |       |        |          |          |          |         |
|                           |                          |       |      |          | IP100103525, IP100396218, |                           |          |           |                 |            |           |          |      |    |      |          |                           |     |       |        |          |          |          |         |
|                           |                          |       |      |          | IP100011986, IP100410717, |                           |          |           |                 |            |           |          |      |    |      |          |                           |     |       |        |          |          |          |         |
|                           |                          |       |      |          | IP100550263, IP100929313, |                           |          |           |                 |            |           |          |      |    |      |          |                           |     |       |        |          |          |          |         |
|                           |                          |       |      |          | IP100784869, IP100645369, |                           |          |           |                 |            |           |          |      |    |      |          |                           |     |       |        |          |          |          |         |
|                           |                          |       |      |          | IP100782992, IP100465370, |                           |          |           |                 |            |           |          |      |    |      |          |                           |     |       |        |          |          |          |         |
|                           |                          |       |      |          | IP100760877, IP100045914, |                           |          |           |                 |            |           |          |      |    |      |          |                           |     |       |        |          |          |          |         |
|                           |                          |       |      |          | IP100165981, IP100304596  |                           |          |           |                 |            |           |          |      |    |      |          |                           |     |       |        |          |          |          |         |
|                           |                          |       |      |          | SP_PIR_KEYWORDS           |                           |          |           |                 |            |           |          | Zinc | 22 | 17.6 | 0.031959 | IP100302755, IP100449924, | 122 | 2,189 | 19,235 | 1.584562 | 0.998978 | 0.174097 | 33.7013 |
|                           |                          |       |      |          |                           |                           |          |           |                 |            |           |          |      |    |      |          | IP100020194, IP100410330, |     |       |        |          |          |          |         |
|                           |                          |       |      |          |                           |                           |          |           |                 |            |           |          |      |    |      |          | IP100008918, IP100020127, |     |       |        |          |          |          |         |
| IP100014513, IP100884250, |                          |       |      |          |                           |                           |          |           |                 |            |           |          |      |    |      |          |                           |     |       |        |          |          |          |         |
| IP100375731, IP100782966, |                          |       |      |          |                           |                           |          |           |                 |            |           |          |      |    |      |          |                           |     |       |        |          |          |          |         |
| IP100410717, IP100027423, |                          |       |      |          |                           |                           |          |           |                 |            |           |          |      |    |      |          |                           |     |       |        |          |          |          |         |
| IP100550263, IP100029400, |                          |       |      |          |                           |                           |          |           |                 |            |           |          |      |    |      |          |                           |     |       |        |          |          |          |         |
| IP100438229, IP100220823, |                          |       |      |          |                           |                           |          |           |                 |            |           |          |      |    |      |          |                           |     |       |        |          |          |          |         |
| IP100465370, IP100009841, |                          |       |      |          |                           |                           |          |           |                 |            |           |          |      |    |      |          |                           |     |       |        |          |          |          |         |
| IP100941117, IP100165981, |                          |       |      |          |                           |                           |          |           |                 |            |           |          |      |    |      |          |                           |     |       |        |          |          |          |         |
| IP100221354, IP100789624  |                          |       |      |          |                           |                           |          |           |                 |            |           |          |      |    |      |          |                           |     |       |        |          |          |          |         |
| SP_PIR_KEYWORDS           | DNA-binding              | 26    | 20.8 | 2.16E-04 |                           | IP100020194, IP100028888, | 122      | 1,868     | 19,235          | 2.194466   | 0.044702  | 0.002686 |      |    |      |          | 0.272584                  |     |       |        |          |          |          |         |
|                           |                          |       |      |          |                           | IP100031801, IP100014513, |          |           |                 |            |           |          |      |    |      |          |                           |     |       |        |          |          |          |         |
|                           |                          |       |      |          | IP100479786, IP100010740, |                           |          |           |                 |            |           |          |      |    |      |          |                           |     |       |        |          |          |          |         |
|                           |                          |       |      |          | IP100888857, IP100220823, |                           |          |           |                 |            |           |          |      |    |      |          |                           |     |       |        |          |          |          |         |
|                           |                          |       |      |          | IP100219330, IP100216049, |                           |          |           |                 |            |           |          |      |    |      |          |                           |     |       |        |          |          |          |         |
|                           |                          |       |      |          | IP100016610, IP100300631, |                           |          |           |                 |            |           |          |      |    |      |          |                           |     |       |        |          |          |          |         |
|                           |                          |       |      |          | IP100304596, IP100183699, |                           |          |           |                 |            |           |          |      |    |      |          |                           |     |       |        |          |          |          |         |
|                           |                          |       |      |          | IP100020127, IP100884250, |                           |          |           |                 |            |           |          |      |    |      |          |                           |     |       |        |          |          |          |         |
|                           |                          |       |      |          | IP100006079, IP100021700, |                           |          |           |                 |            |           |          |      |    |      |          |                           |     |       |        |          |          |          |         |
|                           |                          |       |      |          | IP100217465, IP100004859, |                           |          |           |                 |            |           |          |      |    |      |          |                           |     |       |        |          |          |          |         |
|                           |                          |       |      |          | IP100220834, IP100031812, |                           |          |           |                 |            |           |          |      |    |      |          |                           |     |       |        |          |          |          |         |
|                           |                          |       |      |          | IP100009841, IP100045914, |                           |          |           |                 |            |           |          |      |    |      |          |                           |     |       |        |          |          |          |         |
|                           |                          |       |      |          | IP100642705, IP100221354  |                           |          |           |                 |            |           |          |      |    |      |          |                           |     |       |        |          |          |          |         |
| SP_PIR_KEYWORDS           | Transcription regulation | 28    | 22.4 | 1.22E-04 | IP100028888, IP100031801, | 122                       | 2,026    | 19,235    | 2.178968        | 0.025576   | 0.001849  | 0.154519 |      |    |      |          |                           |     |       |        |          |          |          |         |
|                           |                          |       |      |          | IP100014513, IP100008575, |                           |          |           |                 |            |           |          |      |    |      |          |                           |     |       |        |          |          |          |         |
|                           |                          |       |      |          | IP100479786, IP100103525, |                           |          |           |                 |            |           |          |      |    |      |          |                           |     |       |        |          |          |          |         |
|                           |                          |       |      |          |                           |                           |          |           |                 |            |           |          |      |    |      |          |                           |     |       |        |          |          |          |         |





Supplementary Table 3. Continued

| Category        | Term        | Count | %    | p-value  | Genes                                                                                                                                                                                                                                                                                                                                                                                                                                                                                                                                                                                                                | List total | Pop hits | Pop total | Fold enrichment | Bonferroni | Benjamini | FDR      |
|-----------------|-------------|-------|------|----------|----------------------------------------------------------------------------------------------------------------------------------------------------------------------------------------------------------------------------------------------------------------------------------------------------------------------------------------------------------------------------------------------------------------------------------------------------------------------------------------------------------------------------------------------------------------------------------------------------------------------|------------|----------|-----------|-----------------|------------|-----------|----------|
|                 |             |       |      |          | IP100456853, IP100165981, IP100008524, IP100183699, IP100166044, IP100410330, IP100008918, IP100006079, IP100013939, IP100216592, IP100010486, IP100410717, IP100412714, IP100009841, IP100023048, IP100013070, IP100221354, IP100783872, IP100449924, IP100020194, IP100003865, IP100418819, IP100103525, IP100010740, IP100922213, IP100027423, IP100029400, IP100158804, IP100220823, IP100782992, IP100216049, IP100219330, IP100743873, IP100789624, IP100003406, IP100396378, IP100218319, IP100026314, IP100015625, IP100011986, IP100784869, IP100645369, IP100419373, IP100642705, IP100026612, IP100064328 | 122        | 2,635    | 19,235    | 4.008912        | 4.64E-24   | 4.64E-24  | 2.77E-23 |
| SP_PIR_KEYWORDS | Acetylation | 67    | 53.6 | 2.19E-26 | IP100015018, IP100012079, IP100028888, IP100375731, IP100029019, IP100008575, IP100479786, IP100304692, IP100413108, IP100012382, IP100013468, IP100000816, IP100004795, IP100883857, IP100438229, IP100104050, IP100007102, IP100008524, IP100304596, IP100293655, IP100020127, IP100006079, IP100216592, IP100013939, IP100410717, IP100412714, IP100003362, IP100021700,                                                                                                                                                                                                                                          | 67         | 53.6     | 2.19E-26  |                 |            |           |          |

Supplementary Table 3. Continued

| Category        | Term    | Count | %    | p-value  | Genes                                                                                                                                                                                                                                                                                                                                                                                                                                                                                                                     | List total | Pop hits | Pop total | Fold enrichment | Bonferroni | Benjamini | FDR      |  |  |  |  |
|-----------------|---------|-------|------|----------|---------------------------------------------------------------------------------------------------------------------------------------------------------------------------------------------------------------------------------------------------------------------------------------------------------------------------------------------------------------------------------------------------------------------------------------------------------------------------------------------------------------------------|------------|----------|-----------|-----------------|------------|-----------|----------|--|--|--|--|
|                 |         |       |      |          | IP100152695, IP100023048, IP100740961, IP100013070, IP100304925, IP100449924, IP100020194, IP100003865, IP100103525, IP100010740, IP100027423, IP100008868, IP100029400, IP100027834, IP100419880, IP100782992, IP100216049, IP100219330, IP100743873, IP100300631, IP100003406, IP100029601, IP100396378, IP100186290, IP100218319, IP100297579, IP100025039, IP100217465, IP100004859, IP100328840, IP100220834, IP100021439, IP100419373, IP100031812, IP100396435, IP100007752, IP100642705, IP100106567, IP100064328 | 122        | 4,283    | 19,235    | 2.539998        | 1.18E-13   | 2.94E-14  | 6.99E-13 |  |  |  |  |
| SP_PIR_KEYWORDS | Nucleus | 69    | 55.2 | 5.26E-16 | IP100028888, IP100031801, IP100014513, IP100375731, IP100651653, IP100008575, IP100479786, IP100304692, IP100413108, IP100012382, IP100013468, IP100004795, IP100883857, IP100438229, IP100104050, IP100016610, IP100760877, IP100008524, IP100304596, IP100183699, IP100410330, IP100020127, IP100884250, IP100006079, IP100216592, IP100013939, IP100410717, IP100412714, IP100021700, IP100152695, IP100642862, IP100009841, IP100045914, IP100740961,                                                                 | 69         | 55.2     | 5.26E-16  |                 |            |           |          |  |  |  |  |

Supplementary Table 3. Continued

| Category        | Term           | Count | %  | p-value  | Genes                                                                                                                                                                                                                                                                                                                                                                                                                                                                                                        | List total | Pop hits | Pop total | Fold enrichment | Bonferroni | Benjamini | FDR      |  |  |  |
|-----------------|----------------|-------|----|----------|--------------------------------------------------------------------------------------------------------------------------------------------------------------------------------------------------------------------------------------------------------------------------------------------------------------------------------------------------------------------------------------------------------------------------------------------------------------------------------------------------------------|------------|----------|-----------|-----------------|------------|-----------|----------|--|--|--|
|                 |                |       |    |          | IP100013070, IP100221354, IP10044924, IP100020194, IP100103525, IP100782966, IP100010740, IP100027423, IP100029400, IP100419880, IP100027834, IP100158804, IP100220823, IP100782992, IP100216049, IP100219330, IP100941117, IP100300631, IP100012202, IP100396378, IP100302755, IP100297579, IP100025039, IP100100798, IP100217465, IP100032995, IP100004859, IP100328840, IP100220834, IP100419373, IP100031812, IP100396435, IP100642705, IP100106567, IP100064328                                         | 122        | 7,263    | 19,235    | 2.170783        | 4.71E-21   | 1.57E-21  | 2.81E-20 |  |  |  |
| SP_PIR_KEYWORDS | Phosphoprotein | 100   | 80 | 2.22E-23 | IP100012079, IP100028888, IP100031801, IP100014513, IP100008575, IP100651653, IP100413108, IP100550263, IP100013468, IP100000816, IP10088857, IP100307257, IP100104050, IP100016610, IP100304596, IP100183699, IP100166044, IP100410330, IP100293655, IP100006079, IP100013939, IP100216592, IP100010486, IP100412714, IP100003362, IP100152695, IP100103552, IP100642862, IP100023048, IP100013070, IP100011736, IP100221354, IP100020194, IP100003865, IP100418819, IP100385383, IP100782992, IP100219330, | 100        | 80       | 2.22E-23  |                 |            |           |          |  |  |  |

Supplementary Table 3. Continued

| Category | Term | Count | % | p-value | Genes                     | List total | Pop hits | Pop total | Fold enrichment | Bonferroni | Benjamini | FDR |
|----------|------|-------|---|---------|---------------------------|------------|----------|-----------|-----------------|------------|-----------|-----|
|          |      |       |   |         | IP100789624, IP100003406, |            |          |           |                 |            |           |     |
|          |      |       |   |         | IP100012202, IP100396378, |            |          |           |                 |            |           |     |
|          |      |       |   |         | IP100218319, IP100297579, |            |          |           |                 |            |           |     |
|          |      |       |   |         | IP100025039, IP100100798, |            |          |           |                 |            |           |     |
|          |      |       |   |         | IP100217465, IP100004859, |            |          |           |                 |            |           |     |
|          |      |       |   |         | IP100021439, IP100396435, |            |          |           |                 |            |           |     |
|          |      |       |   |         | IP100642705, IP100375731, |            |          |           |                 |            |           |     |
|          |      |       |   |         | IP100029019, IP100479786, |            |          |           |                 |            |           |     |
|          |      |       |   |         | IP100304692, IP100788168, |            |          |           |                 |            |           |     |
|          |      |       |   |         | IP100012382, IP100004795, |            |          |           |                 |            |           |     |
|          |      |       |   |         | IP100438229, IP100760877, |            |          |           |                 |            |           |     |
|          |      |       |   |         | IP100005087, IP100456853, |            |          |           |                 |            |           |     |
|          |      |       |   |         | IP100008524, IP100008918, |            |          |           |                 |            |           |     |
|          |      |       |   |         | IP100020127, IP100396218, |            |          |           |                 |            |           |     |
|          |      |       |   |         | IP100410717, IP100219301, |            |          |           |                 |            |           |     |
|          |      |       |   |         | IP100009841, IP100045914, |            |          |           |                 |            |           |     |
|          |      |       |   |         | IP100740961, IP100304925, |            |          |           |                 |            |           |     |
|          |      |       |   |         | IP100783872, IP100449924, |            |          |           |                 |            |           |     |
|          |      |       |   |         | IP100103525, IP100782966, |            |          |           |                 |            |           |     |
|          |      |       |   |         | IP100010740, IP100922213, |            |          |           |                 |            |           |     |
|          |      |       |   |         | IP100027423, IP100008868, |            |          |           |                 |            |           |     |
|          |      |       |   |         | IP100029400, IP100027834, |            |          |           |                 |            |           |     |
|          |      |       |   |         | IP100419880, IP100220823, |            |          |           |                 |            |           |     |
|          |      |       |   |         | IP100465370, IP100216049, |            |          |           |                 |            |           |     |
|          |      |       |   |         | IP100743873, IP100941117, |            |          |           |                 |            |           |     |
|          |      |       |   |         | IP100300631, IP100029601, |            |          |           |                 |            |           |     |
|          |      |       |   |         | IP100186290, IP100026314, |            |          |           |                 |            |           |     |
|          |      |       |   |         | IP100032995, IP100328840, |            |          |           |                 |            |           |     |
|          |      |       |   |         | IP100220834, IP100645369, |            |          |           |                 |            |           |     |
|          |      |       |   |         | IP100031812, IP100419373, |            |          |           |                 |            |           |     |
|          |      |       |   |         | IP100007752, IP100106567  |            |          |           |                 |            |           |     |

HP1 $\gamma$ , heterochromatin protein 1 $\gamma$ ; FDR, false discovery rate.

**Supplementary Table 4.** Analysis of domains in proteins that interact with HP1 $\gamma$ 

| Category | Term      | Count                                | %  | p-value | Genes    | List total                                                                                                                                                                                                                                                         | Pop hits | Pop total | Fold enrichment | Bonferroni | Benjamini | FDR      |
|----------|-----------|--------------------------------------|----|---------|----------|--------------------------------------------------------------------------------------------------------------------------------------------------------------------------------------------------------------------------------------------------------------------|----------|-----------|-----------------|------------|-----------|----------|
| INTERPRO | IPR000504 | RNA recognition motif, RNP-1         | 20 | 16      | 1.31E-16 | IP100396378, IP100012079, IP100020194, IP100028888, IP100375731, IP100216592, IP100103525, IP100010740, IP100304692, IP100012382, IP100328840, IP100027834, IP100642862, IP100419373, IP100009841, IP100045914, IP100221354, IP100300631, IP100008524, IP100304596 | 111      | 211       | 16,659          | 14.22569   | 2.89E-14  | 2.89E-14 |
| INTERPRO | IPR012677 | Nucleotide-binding, alpha-beta plait | 20 | 16      | 1.56E-16 | IP100396378, IP100012079, IP100020194, IP100028888, IP100375731, IP100216592, IP100103525, IP100010740, IP100304692, IP100012382, IP100328840, IP100027834, IP100642862, IP100419373, IP100009841, IP100045914, IP100221354, IP100300631, IP100008524, IP100304596 | 111      | 213       | 16,659          | 14.09212   | 2.89E-14  | 1.44E-14 |
| INTERPRO | IPR015943 | WD40/YVTN repeat-like                | 7  | 5.6     | 0.014599 | IP100013468, IP100152695, IP100166044, IP100782966, IP100106567, IP100010486, IP100012202                                                                                                                                                                          | 111      | 300       | 16,659          | 3.501892   | 0.978154  | 0.293628 |
| INTERPRO | IPR017986 | WD40 repeat, region                  | 6  | 4.8     | 0.020816 | IP100013468, IP100152695, IP100166044, IP100782966, IP100106567, IP100012202                                                                                                                                                                                       | 111      | 238       | 16,659          | 3.783557   | 0.995785  | 0.366039 |
| INTERPRO | IPR019781 | WD40 repeat, subgroup                | 6  | 4.8     | 0.022182 | IP100013468, IP100152695, IP100166044, IP100782966, IP100106567, IP100012202                                                                                                                                                                                       | 111      | 242       | 16,659          | 3.721019   | 0.997069  | 0.361504 |
| INTERPRO | IPR001680 | WD40 repeat                          | 6  | 4.8     | 0.031608 | IP100013468, IP100152695, IP100166044, IP100782966, IP100106567, IP100012202                                                                                                                                                                                       | 111      | 266       | 16,659          | 3.385288   | 0.999764  | 0.426908 |
| INTERPRO | IPR019775 | WD40 repeat, conserved site          | 6  | 4.8     | 0.036655 | IP100013468, IP100152695, IP100166044, IP100782966, IP100106567, IP100012202                                                                                                                                                                                       | 111      | 277       | 16,659          | 3.250854   | 0.999939  | 0.416904 |

Supplementary Table 4. Continued

| Category | Term      | Count                                            | % | p-value | Genes    | List total                                                      | Pop hits | Pop total | Fold enrichment | Bonferroni | Benjamini | FDR      |
|----------|-----------|--------------------------------------------------|---|---------|----------|-----------------------------------------------------------------|----------|-----------|-----------------|------------|-----------|----------|
| INTERPRO | IPR001876 | Zinc finger, RanBP2-type                         | 5 | 4       | 1.73E-05 | IP100020194, IP100029400, IP100375731, IP100009841, IP100221354 | 111      | 24        | 16,659          | 31.26689   | 0.00448   | 0.001496 |
| INTERPRO | IPR019782 | WD40 repeat 2                                    | 5 | 4       | 0.062771 | IP100013468, IP100152695, IP100782966, IP100106567, IP100012202 | 111      | 226       | 16,659          | 3.320378   | 1         | 0.519455 |
| INTERPRO | IPR004088 | K Homology, type 1                               | 4 | 3.2     | 0.001323 | IP100008575, IP100216049, IP100016610, IP100479786              | 111      | 33        | 16,659          | 18.19165   | 0.291229  | 0.066528 |
| INTERPRO | IPR018111 | K Homology, type 1, subgroup                     | 4 | 3.2     | 0.001572 | IP100008575, IP100216049, IP100016610, IP100479786              | 111      | 35        | 16,659          | 17.15212   | 0.335714  | 0.065902 |
| INTERPRO | IPR012340 | Nucleic acid-binding, OB-fold                    | 4 | 3.2     | 0.005163 | IP100031801, IP100020127, IP100031812, IP100013939              | 111      | 53        | 16,659          | 11.32687   | 0.739699  | 0.138901 |
| INTERPRO | IPR001650 | DNA/RNA helicase, C-terminal                     | 4 | 3.2     | 0.033901 | IP100004859, IP100293655, IP100651653, IP100396435              | 111      | 107       | 16,659          | 5.610508   | 0.999872  | 0.429048 |
| INTERPRO | IPR014021 | Helicase, superfamily 1 and 2, ATP-binding       | 4 | 3.2     | 0.033901 | IP100004859, IP100293655, IP100651653, IP100396435              | 111      | 107       | 16,659          | 5.610508   | 0.999872  | 0.429048 |
| INTERPRO | IPR014001 | DEAD-like helicase, N-terminal                   | 4 | 3.2     | 0.035523 | IP100004859, IP100293655, IP100651653, IP100396435              | 111      | 109       | 16,659          | 5.507563   | 0.999918  | 0.424878 |
| INTERPRO | IPR012975 | NOPS                                             | 3 | 2.4     | 1.29E-04 | IP100103525, IP100010740, IP100304596                           | 111      | 3         | 16,659          | 150.0811   | 0.033001  | 0.008354 |
| INTERPRO | IPR013126 | Heat shock protein 70                            | 3 | 2.4     | 0.002731 | IP100003362, IP100003865, IP100304925                           | 111      | 12        | 16,659          | 37.52027   | 0.508862  | 0.096587 |
| INTERPRO | IPR001023 | Heat shock protein Hsp70                         | 3 | 2.4     | 0.002731 | IP100003362, IP100003865, IP100304925                           | 111      | 12        | 16,659          | 37.52027   | 0.508862  | 0.096587 |
| INTERPRO | IPR018181 | Heat shock protein 70, conserved site            | 3 | 2.4     | 0.004289 | IP100003362, IP100003865, IP100304925                           | 111      | 15        | 16,659          | 30.01622   | 0.672914  | 0.130373 |
| INTERPRO | IPR003034 | DNA-binding SAP                                  | 3 | 2.4     | 0.009985 | IP100883857, IP100013070, IP100300631                           | 111      | 23        | 16,659          | 19.57579   | 0.926408  | 0.229658 |
| INTERPRO | IPR004087 | K Homology                                       | 3 | 2.4     | 0.024759 | IP100008575, IP100216049, IP100479786                           | 111      | 37        | 16,659          | 12.16874   | 0.998524  | 0.372246 |
| INTERPRO | IPR018355 | SPla/Ryanodine receptor subgroup                 | 3 | 2.4     | 0.051154 | IP100883857, IP100293655, IP100013070                           | 111      | 55        | 16,659          | 8.186241   | 0.999999  | 0.494708 |
| INTERPRO | IPR011545 | DNA/RNA helicase, DEAD/DEAH box type, N-terminal | 3 | 2.4     | 0.061467 | IP100004859, IP100293655, IP100651653                           | 111      | 61        | 16,659          | 7.381037   | 1         | 0.527498 |

Supplementary Table 4. Continued

| Category | Term      | Count                                              | % | p-value | Genes    | List total               | Pop hits | Pop total | Fold enrichment | Bonferroni | Benjamini | FDR      |
|----------|-----------|----------------------------------------------------|---|---------|----------|--------------------------|----------|-----------|-----------------|------------|-----------|----------|
| INTERPRO | IPR019844 | Cold-shock conserved site                          | 2 | 1.6     | 0.038976 | IP100031801, IP100031812 | 111      | 6         | 16,659          | 50.02703   | 0.999968  | 0.419592 |
| INTERPRO | IPR011129 | Cold shock protein                                 | 2 | 1.6     | 0.05163  | IP100031801, IP100031812 | 111      | 8         | 16,659          | 37.52027   | 0.999999  | 0.481244 |
| INTERPRO | IPR002059 | Cold-shock protein, DNA-binding                    | 2 | 1.6     | 0.05163  | IP100031801, IP100031812 | 111      | 8         | 16,659          | 37.52027   | 0.999999  | 0.481244 |
| INTERPRO | IPR004365 | Nucleic acid binding, OB-fold, tRNA /helicase-type | 2 | 1.6     | 0.076446 | IP100020127, IP100013939 | 111      | 12        | 16,659          | 25.01351   | 1         | 0.577484 |

HP1 $\gamma$ ; heterochromatin protein 1 $\gamma$ ; FDR, false discovery rate.

**Supplementary Table 5.** Gene ontology analysis of DNA damage response-related genes that interact with HP1 $\gamma$

| Category      | Term                                       | Count | % | p-value     | Genes       | List total                          | Pop hits | Pop total | Fold enrichment | Bonferroni | Benjamini | FDR     |
|---------------|--------------------------------------------|-------|---|-------------|-------------|-------------------------------------|----------|-----------|-----------------|------------|-----------|---------|
| GOTERM_BP_FAT | GO:0006281 DNA repair                      | 8     | 8 | 0.456100342 | 0.005651094 | BLM, XRCC5, RPA2, SFPQ, PCNA        | 103      | 284       | 13.528          | 3.69971    | 0.99036   | 0.1983  |
| GOTERM_BP_FAT | GO:0006310 DNA recombination               | 5     | 5 | 0.285062714 | 0.008141841 | BLM, SVPQ, RPA1, XRCC5              | 103      | 105       | 13.528          | 6.25428    | 0.99876   | 0.24344 |
| GOTERM_BP_FAT | GO:0006974 Response to DNA damage stimulus | 8     | 8 | 0.456100342 | 0.02262858  | BLM XRCC5, RPA2, PLZF, SFPQ, PCNA   | 103      | 373       | 13.528          | 2.81694    | 1         | 0.43337 |
| GOTERM_BP_FAT | GO:0051276 Chromosome organization         | 9     | 9 | 0.513112885 | 0.030032507 | BLM, XRCC5, SAFB, CBX3, ARID1A BUB3 | 103      | 485       | 13.528          | 2.43723    | 1         | 0.47289 |
| GOTERM_BP_FAT | GO:0006259 DNA metabolic process           | 9     | 9 | 0.513112885 | 0.037197279 | BLM, SFPQ, POGZ, XRCC5, RPA2, PCNA  | 103      | 506       | 13.528          | 2.33608    | 1         | 0.5225  |
| GOTERM_BP_FAT | GO:0006289 Nucleotide -excision repair     | 3     | 3 | 0.171037628 | 0.06459413  | RPA2, PCNA                          | 103      | 55        | 13.528          | 7.16399    | 1         | 0.66505 |
| GOTERM_BP_FAT | GO:0006302 Double-strand break repair      | 3     | 3 | 0.171037628 | 0.079548154 | BLM, XRCC5                          | 103      | 62        | 13.528          | 6.35515    | 1         | 0.71554 |

HP1 $\gamma$ , heterochromatin protein 1 $\gamma$ ; FDR, false discovery rate.
